# Supplementary material for: Construction of an energy transfer system in the bio-nanocup space by heteromeric assembly of gp27 and gp5 proteins isolated from bacteriophage T4
Source: Royal Society of Chemistry journal article supplement (doi:10.1039/b904297k), 2009-01-01
Supplement: b904297k.pdf [file b904297k.pdf]

## Supplementary Information

### Construction of an Energy Transfer System by Heteromeric Assembly of gp27 and gp5 Proteins Isolated From Bacteriophage T4

Tomomi Koshiyama, Takafumi Ueno\*,

Shuji Kanamaru, Fumio Arisaka and Yoshihito Watanabe\*

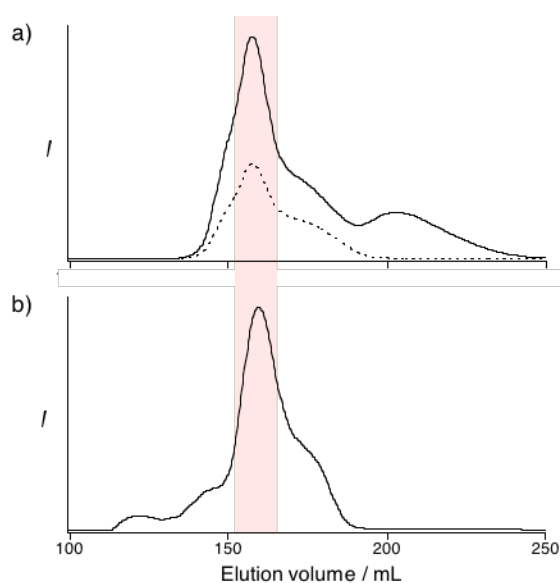

**Fig. S1** Size-exclusion chromatography elution profile of (a) **1•Fl-2•TMR** and (b) unmodified (WTgp27-gp5\_N7C/S351L)<sub>3</sub> monitored at 280 nm (protein, solid line) and 490 nm (fluorescein, broken line). The fraction colored with red (elution volume; 155-165 ml) of **1•Fl-2•TMR** was used for all measurement.

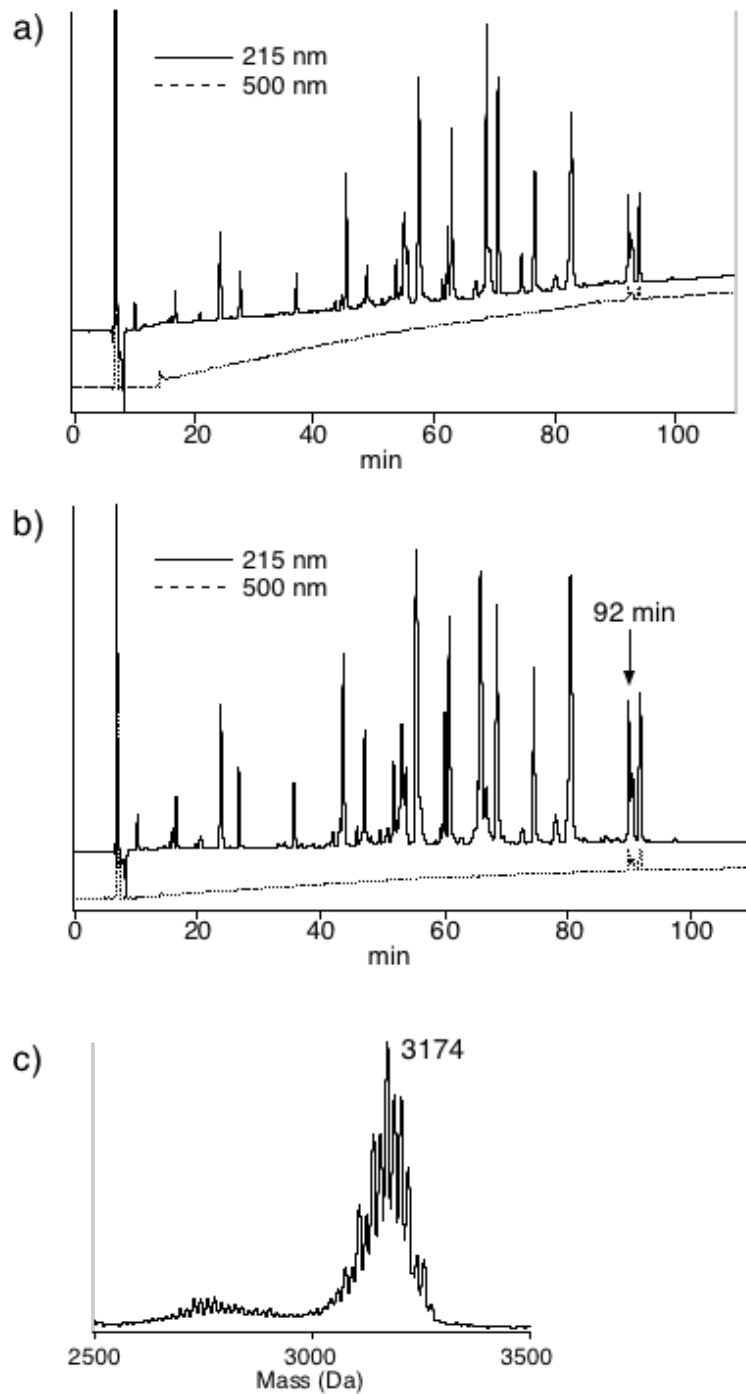

**Fig. S2** The elution profiles of reverse phase HPLC of a) **1•Fl** and b) **1•Fl** reacted with NEM. c) MALDI-TOF MS spectrum of the 1-23 fragment of gp5\_N7C/S351L•Fl after reaction of **1•Fl** with NEM (the peak at 92 min in Fig S2b). The calculated MW of the 1-23 fragment of gp5\_N7C/S351L•Fl is 3152 Da.
